# Supplementary material for: Distinct Biological Potential of Streptococcus gordonii and Streptococcus sanguinis Revealed by Comparative Genome Analysis
Source: PubMed Central journal article supplement (PMC5462765; doi:10.1038/s41598-017-02399-4), 2017-06-07
Supplement: 41598_2017_2399_MOESM1_ESM.pdf [file 41598_2017_2399_MOESM1_ESM.pdf]

# **Distinct Biological Potential of *Streptococcus gordonii* and *Streptococcus sanguinis* Revealed by Comparative Genome Analysis**

**Wenning Zheng<sup>1,2</sup>; Mui Fern Tan<sup>1,2</sup>; Lesley A. Old<sup>4</sup>; Ian C. Paterson<sup>2,3</sup>; Nicholas S Jakubovics<sup>4,5\*</sup>; Siew Woh Choo<sup>1,2\*</sup>**

<sup>1</sup>Genome Informatics Research Laboratory, High Impact Research Building (HIR) Building, University of Malaya, 50603 Kuala Lumpur, Malaysia

<sup>2</sup>Department of Oral and Craniofacial Sciences, Faculty of Dentistry, University of Malaya, 50603 Kuala Lumpur, Malaysia

<sup>3</sup>Oral Cancer Research and Coordinating Centre, Faculty of Dentistry, University of Malaya, 50603 Kuala Lumpur, Malaysia

<sup>4</sup>Centre for Oral Health Research, School of Dental Sciences, Newcastle University, Newcastle upon Tyne, NE2 4BW, United Kingdom

<sup>5</sup>Genome Solutions Sdn Bhd, Suite 8, Innovation Incubator UM, Level 5, Research Management & Innovation Complex, University of Malaya, 50603 Kuala Lumpur, Malaysia

**\*=Corresponding authors**

**Siew Woh Choo**

**Email: [lawrence.choo@xjtlu.edu.cn](mailto:lawrence.choo@xjtlu.edu.cn)**

**Nicholas S. Jakubovics**

**Tel: +44 (0) 191 208 6796 ; Email: [nick.jakubovics@ncl.ac.uk](mailto:nick.jakubovics@ncl.ac.uk)**

**S1 Table: Functional enrichment analyses shows Ss unique core genes enriched in compound biosynthetic process (8) and cobalamin biosynthesis process (20).**

| Enriched biological process                        | Rast_ID                                                                                                                                                                                                                                                                                                                      | Enriched <i>Streptococcus sanguinis</i> unique core genes                                                                                                                                                                                                                                                                                                                                                                                                                                                                                                                                                                                                                                                                                                                                                                                                                                                                                                                                                                                                                                                                      |
|----------------------------------------------------|------------------------------------------------------------------------------------------------------------------------------------------------------------------------------------------------------------------------------------------------------------------------------------------------------------------------------|--------------------------------------------------------------------------------------------------------------------------------------------------------------------------------------------------------------------------------------------------------------------------------------------------------------------------------------------------------------------------------------------------------------------------------------------------------------------------------------------------------------------------------------------------------------------------------------------------------------------------------------------------------------------------------------------------------------------------------------------------------------------------------------------------------------------------------------------------------------------------------------------------------------------------------------------------------------------------------------------------------------------------------------------------------------------------------------------------------------------------------|
| Porphyrin-containing compound biosynthetic process | SK36.peg.479<br>SK36.peg.476<br>SK36.peg.475<br>SK36.peg.474<br>SK36.peg.465<br>SK36.peg.461<br>SK36.peg.2040<br>SK36.peg.2038                                                                                                                                                                                               | Glutamate-1-semialdehyde aminotransferase (EC 5.4.3.8)<br>Porphobilinogen deaminase (EC 2.5.1.61)<br>Glutamyl-tRNA reductase (EC 1.2.1.70)<br>Siroheme synthase / Precorrin-2 oxidase (EC 1.3.1.76)<br>Uroporphyrinogen-III methyltransferase (EC 2.1.1.107) / Uroporphyrinogen-III synthase (EC 4.2.1.75)<br>Cobalt-precorrin-4 C11-methyltransferase (EC 2.1.1.133) /cobM<br>FIG01117915: hypothetical protein<br>FIG01118726: hypothetical protein                                                                                                                                                                                                                                                                                                                                                                                                                                                                                                                                                                                                                                                                          |
| Cobalamin biosynthetic process                     | SK36.peg.481<br>SK36.peg.480<br>SK36.peg.472<br>SK36.peg.502<br>SK36.peg.469<br>SK36.peg.500<br>SK36.peg.468<br>SK36.peg.467<br>SK36.peg.466<br>SK36.peg.464<br>SK36.peg.463<br>SK36.peg.462<br>SK36.peg.461<br>SK36.peg.460<br>SK36.peg.459<br>SK36.peg.458<br>SK36.peg.457<br>SK36.peg.456<br>SK36.peg.455<br>SK36.peg.454 | Cobalamin synthase<br>Adenosylcobinamide-phosphate guanylyltransferase (EC 2.7.7.62) / cobU<br>Cobyric acid synthase<br>Nicotinate-nucleotide--dimethylbenzimidazole phosphoribosyltransferase (EC 2.4.2.21) / cobT<br>Additional substrate-specific component CbiN of cobalt ECF transporter<br>L-threonine 3-O-phosphate decarboxylase (EC 4.1.1.81)<br>Substrate-specific component CbiM of cobalt ECF transporter<br>Cobalt-precorrin-2 C20-methyltransferase (EC 2.1.1.130)<br>Sirohydrochlorin cobaltochelataase CbiK (EC 4.99.1.3)<br>Cobalt-precorrin-6x reductase (EC 1.3.1.54)<br>Cobalt-precorrin-3b C17-methyltransferase /cbiH<br>Cobalamin biosynthesis protein CbiG<br>Cobalt-precorrin-4 C11-methyltransferase (EC 2.1.1.133)<br>Cobalt-precorrin-6y C15-methyltransferase [decarboxylating] (EC 2.1.1.-)<br>Cobalt-precorrin-6y C5-methyltransferase (EC 2.1.1.-)<br>Cobalt-precorrin-6 synthase, anaerobic<br>Cobalt-precorrin-8x methylmutase (EC 5.4.1.2)<br>Cobalt-precorrin-8x methylmutase (EC 5.4.1.2)<br>Adenosylcobinamide-phosphate synthase /cbiP<br>Cobyric acid A, C-diamide synthase /cobB/cbiA |

**S2 Table: Overview of putative prophages including the size of the prophage, the number of CDS, ATT-site status and GC content.**

| <b>Prophages</b> | <b>Length (kb)</b> | <b>CDS</b> | <b>ATT-site identified</b> | <b>GC content</b> |
|------------------|--------------------|------------|----------------------------|-------------------|
| 7863_1           | 5.8kb              | 6          | No                         | 40.99%            |
| FSS8_1           | 43.2kb             | 58         | Yes                        | 38.80%            |
| SK12_1           | 36.5kb             | 54         | No                         | 41.25%            |
| SK184_1          | 59.2kb             | 57         | Yes                        | 41.08%            |
| SK184_3          | 48.7kb             | 75         | Yes                        | 40.74%            |
| Channon_2        | 39.4Kb             | 62         | Yes                        | 38.76%            |
| FSS4_1           | 30.9Kb             | 25         | Yes                        | 43.52%            |
| FSS4_2           | 16.4Kb             | 29         | Yes                        | 40.31%            |
| MB451_1          | 23.3Kb             | 26         | Yes                        | 43.51%            |
| SK184_2          | 36kb               | 21         | Yes                        | 37.94%            |
| SK184_4          | 6.9kb              | 11         | No                         | 43.49%            |
| MB666_1          | 47Kb               | 32         | Yes                        | 40.29%            |

**S3 Table: Overview of the putative genomic island (GI) details including the size of the GI, the number of CDS, GC contents and key genes incorporated in each GI.**

| GI    | Size (bp) | Number of CDSs | GC content | Key Genes                                                                                                                                                                                                                                                                                                                                                                                                                                     |
|-------|-----------|----------------|------------|-----------------------------------------------------------------------------------------------------------------------------------------------------------------------------------------------------------------------------------------------------------------------------------------------------------------------------------------------------------------------------------------------------------------------------------------------|
| GI_5  | 5253      | 5              | 33.70%     | DNA recombination and repair protein RecF; FIG001621: Zinc protease; FIG009210: peptidase, M16 family and Transcriptional regulator in cluster with unspecified monosaccharide ABC transport system                                                                                                                                                                                                                                           |
| GI_14 | 10312     | 6              | 20.50%     | hypothetical proteins                                                                                                                                                                                                                                                                                                                                                                                                                         |
| GI_16 | 5085      | 6              | 38.90%     | FIG007079: UPF0348 protein family; FIG145533: Methyltransferase (EC 2.1.1.-); lojap protein;Hydrolase (HAD superfamily), YqeK and Nicotinate-nucleotide adenylyltransferase (EC 2.7.7.18)                                                                                                                                                                                                                                                     |
| GI_31 | 5557      | 6              | 33.60%     | Permease of the drug/metabolite transporter (DMT) superfamily; TetR/AcrR family transcriptional regulator                                                                                                                                                                                                                                                                                                                                     |
| GI_43 | 7035      | 10             | 42.20%     | Integrase; Chromosome segregation helicase and MutT/nudix family protein; 7,8-dihydro-8-oxoguanine-triphosphatase                                                                                                                                                                                                                                                                                                                             |
| GI_45 | 5556      | 8              | 33.60%     | Chromosome (plasmid) partitioning protein ParB / Stage 0 sporulation protein J; Serine protease, DegP/HtrA, do-like (EC 3.4.21.-); LSU m3Psi1915 methyltransferase RlmH and Competence pheromone precursor                                                                                                                                                                                                                                    |
| GI_47 | 7627      | 12             | 43.20%     | Integrase; Chromosome segregation helicase; MutT/nudix family protein; 7,8-dihydro-8-oxoguanine-triphosphatase; acetyltransferase,GNAT family;Ribosomal protein L11 methyltransferase (EC 2.1.1.-); Ribosomal RNA small subunit methyltransferase E (EC 2.1.1.-), and Mobile element protein (2 units)                                                                                                                                        |
| GI_51 | 7355      | 9              | 31.90%     | Chromosome (plasmid) partitioning protein ParB / Stage 0 sporulation protein J; Serine protease, DegP/HtrA, do-like (EC 3.4.21.-);LSU m3Psi1915 methyltransferase RlmH; Competence pheromone precursor; Histidine kinase of the competence regulon ComD; Response regulator of the competence regulon ComE; GTP-binding and nucleic acid-binding protein YchF; Peptidyl-tRNA hydrolase (EC 3.1.1.29) and Transcription-repair coupling factor |
| GI_53 | 4194      | 5              | 44.40%     | CAAX amino terminal protease family family and Transcriptional regulator, TetR family                                                                                                                                                                                                                                                                                                                                                         |
| GI_55 | 5516      | 7              | 48.40%     | V-type ATP synthase subunit C, E, F,G, I and K (EC 3.6.3.14) and Acetyltransferase, GNAT family                                                                                                                                                                                                                                                                                                                                               |
| GI_58 | 7364      | 8              | 32.10%     | Chromosome (plasmid) partitioning protein ParB / Stage 0 sporulation protein J; Serine protease, DegP/HtrA, do-like (EC 3.4.21.-); LSU m3Psi1915 methyltransferase RlmH; Competence pheromone precursor; Histidine kinase of the competence regulon ComD; Response regulator of the competence regulon ComE; GTP-binding and nucleic acid-binding protein YchF and Peptidyl-tRNA hydrolase (EC 3.1.1.29)                                      |
| GI_67 | 4094      | 5              | 41.90%     | Topoisomerase IV subunit B (EC 5.99.1.-) and lipoprotein, putative                                                                                                                                                                                                                                                                                                                                                                            |
| GI_75 | 4183      | 5              | 44.60%     | CAAX amino protease and Transcriptional regulator, TetR family                                                                                                                                                                                                                                                                                                                                                                                |

**S4 Table: The genome sequencing results of 19 isolated *Streptococcus* strains using Next Generation Sequencing Illumina Hiseq 2000 platform.**

| <b>Strain Name</b> | <b>Yield (Mbases)</b> | <b>Number of Reads</b> | <b>Mean Quality Score (PF)</b> |
|--------------------|-----------------------|------------------------|--------------------------------|
| <b>PV40</b>        | 826                   | 8264126                | 36.24                          |
| <b>NCTC 7863</b>   | 822                   | 8222024                | 35.69                          |
| <b>Blackburn</b>   | 1180                  | 11797640               | 36.55                          |
| <b>Channon</b>     | 695                   | 6949680                | 36.49                          |
| <b>FSS2</b>        | 882                   | 8823944                | 36.67                          |
| <b>FSS3</b>        | 944                   | 9442900                | 37.11                          |
| <b>FSS4</b>        | 1294                  | 12943882               | 36.6                           |
| <b>FSS8</b>        | 1010                  | 10102148               | 36.69                          |
| <b>FSS9</b>        | 988                   | 9877224                | 36.61                          |
| <b>M5</b>          | 678                   | 6784012                | 36.43                          |
| <b>M99</b>         | 666                   | 6657462                | 36.19                          |
| <b>MB451</b>       | 1127                  | 11271462               | 36.59                          |
| <b>MB666</b>       | 1095                  | 10949508               | 36.81                          |
| <b>MW10</b>        | 1069                  | 10693318               | 36.94                          |
| <b>PJM8</b>        | 1054                  | 10543052               | 36.63                          |
| <b>PK488</b>       | 624                   | 6240768                | 36.14                          |
| <b>SK12</b>        | 878                   | 8782388                | 36.81                          |
| <b>SK120</b>       | 732                   | 7324194                | 36.96                          |
| <b>SK184</b>       | 680                   | 6795252                | 36.36                          |

**S5 Table: The sequencing coverage of 19 isolated *Streptococcus* strains based on the reference genome sizes of Sg Challis (2.2Mb) and Ss SK36 (2.39Mb).**

| <b>Strain Name</b> | <b>Total Read Length (bp)</b> | <b>Genome Size (bp)</b> | <b>Sequencing Coverage</b> |
|--------------------|-------------------------------|-------------------------|----------------------------|
| <b>PV40</b>        | 826412600                     | 2200000                 | 375.64                     |
| <b>Blackburn</b>   | 721326800                     | 2200000                 | 327.88                     |
| <b>Channon</b>     | 694968000                     | 2200000                 | 315.89                     |
| <b>FSS2</b>        | 882394400                     | 2200000                 | 401.09                     |
| <b>FSS3</b>        | 944290000                     | 2200000                 | 429.22                     |
| <b>FSS8</b>        | 1010214800                    | 2200000                 | 459.19                     |
| <b>M5</b>          | 678401200                     | 2200000                 | 308.36                     |
| <b>M99</b>         | 665746200                     | 2200000                 | 302.61                     |
| <b>MB666</b>       | 1094950800                    | 2200000                 | 497.70                     |
| <b>MW10</b>        | 1069331800                    | 2200000                 | 486.06                     |
| <b>NCTC7863</b>    | 822202400                     | 2390000                 | 344.02                     |
| <b>FSS4</b>        | 1294388200                    | 2390000                 | 541.59                     |
| <b>FSS9</b>        | 987722400                     | 2390000                 | 413.27                     |
| <b>MB451</b>       | 1127146200                    | 2390000                 | 471.61                     |
| <b>PJM8</b>        | 1054305200                    | 2390000                 | 441.13                     |
| <b>PK488</b>       | 624076800                     | 2200000                 | 283.67                     |
| <b>SK12</b>        | 878238800                     | 2200000                 | 399.20                     |
| <b>SK120</b>       | 732419400                     | 2200000                 | 332.92                     |
| <b>SK184</b>       | 679525200                     | 2200000                 | 308.88                     |

**S1 Figure. The heatmap generated for comparative pathogenomics analysis between 15 Sg strains and 27 Ss strains using a threshold of 50% sequence identity and 50% sequence coverage.**

PathoProT - SI:50%, SC:50%

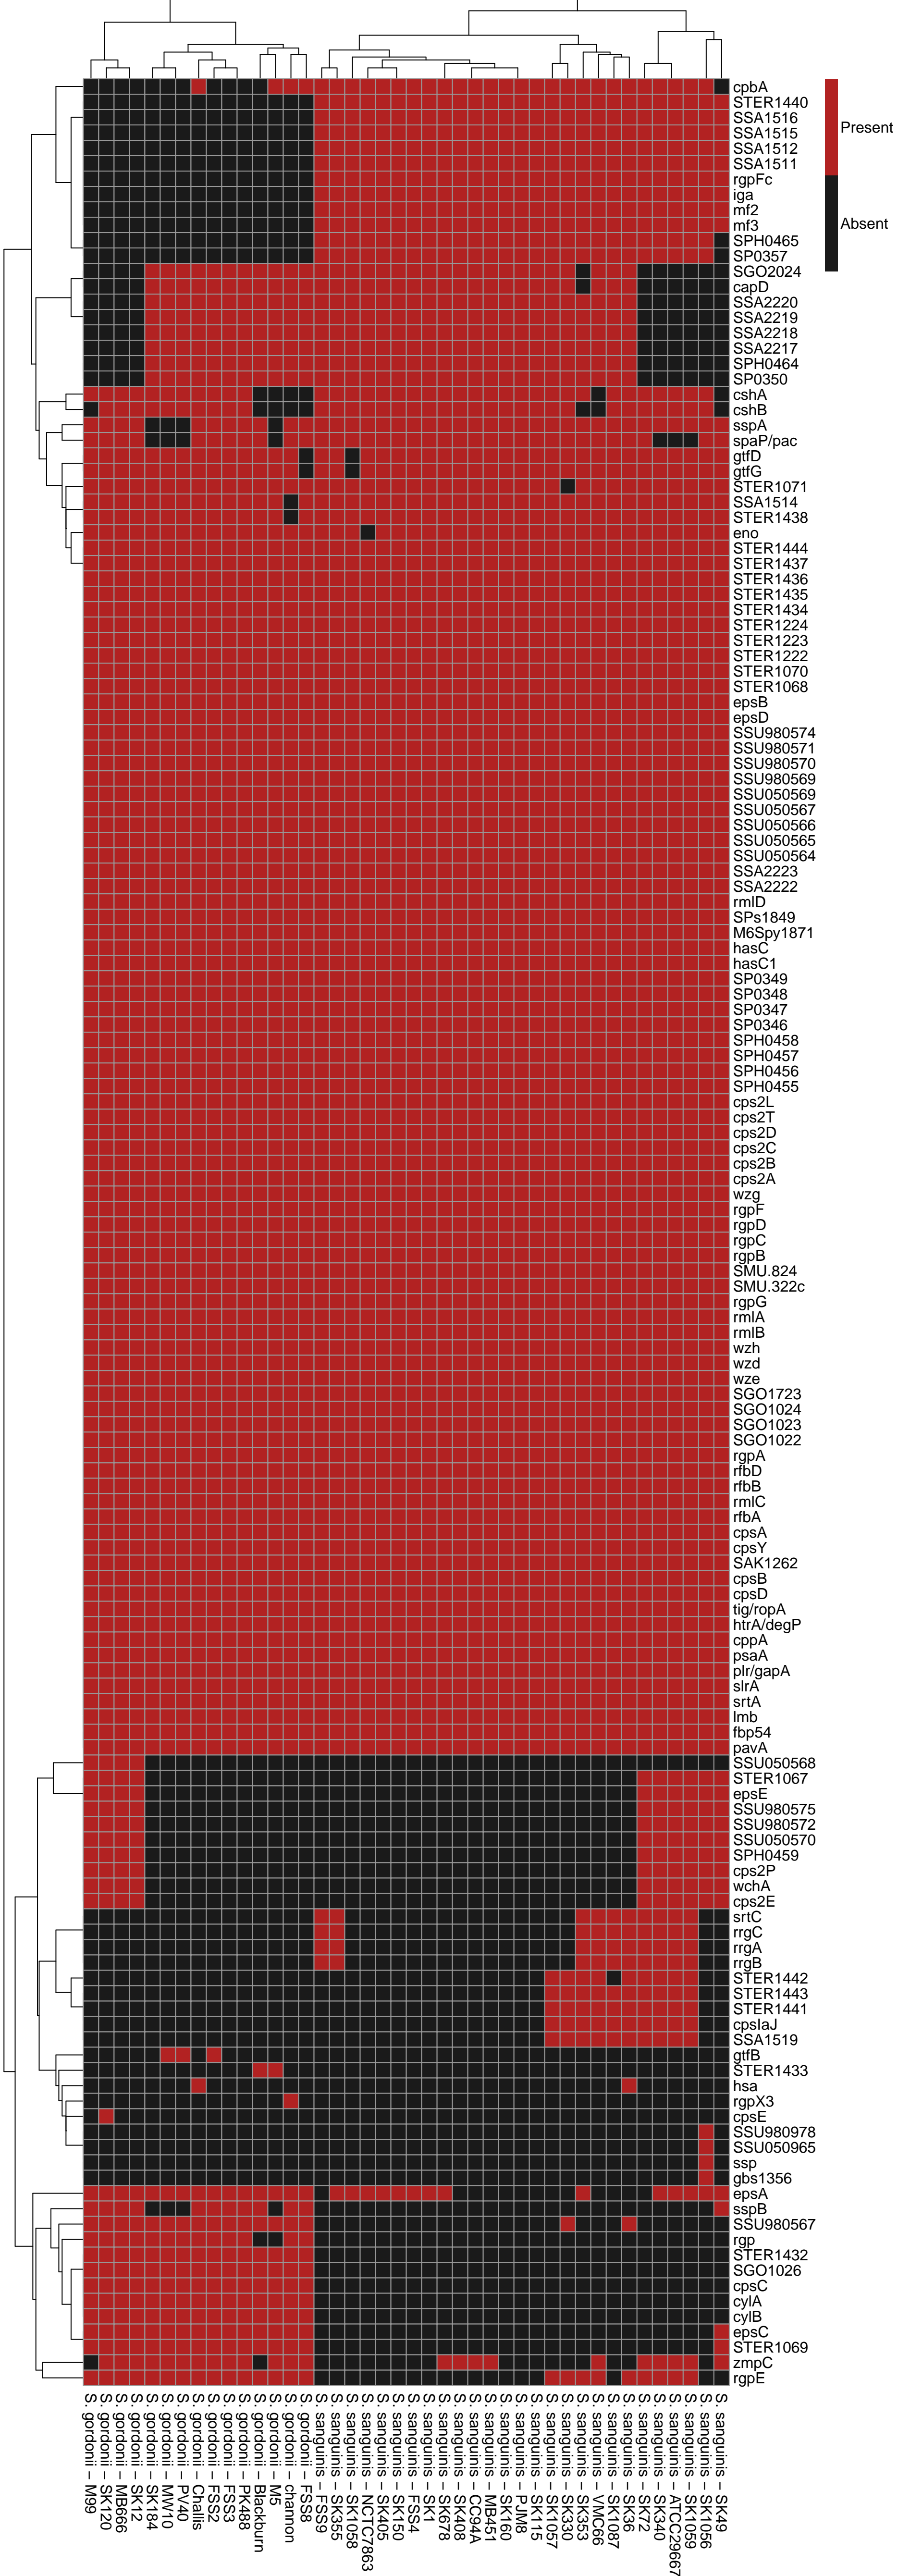



**S2 Figure. The visualization of Sg Challis-type polysaccharide gene cluster structure in Sg and Ss using Mauve software.**

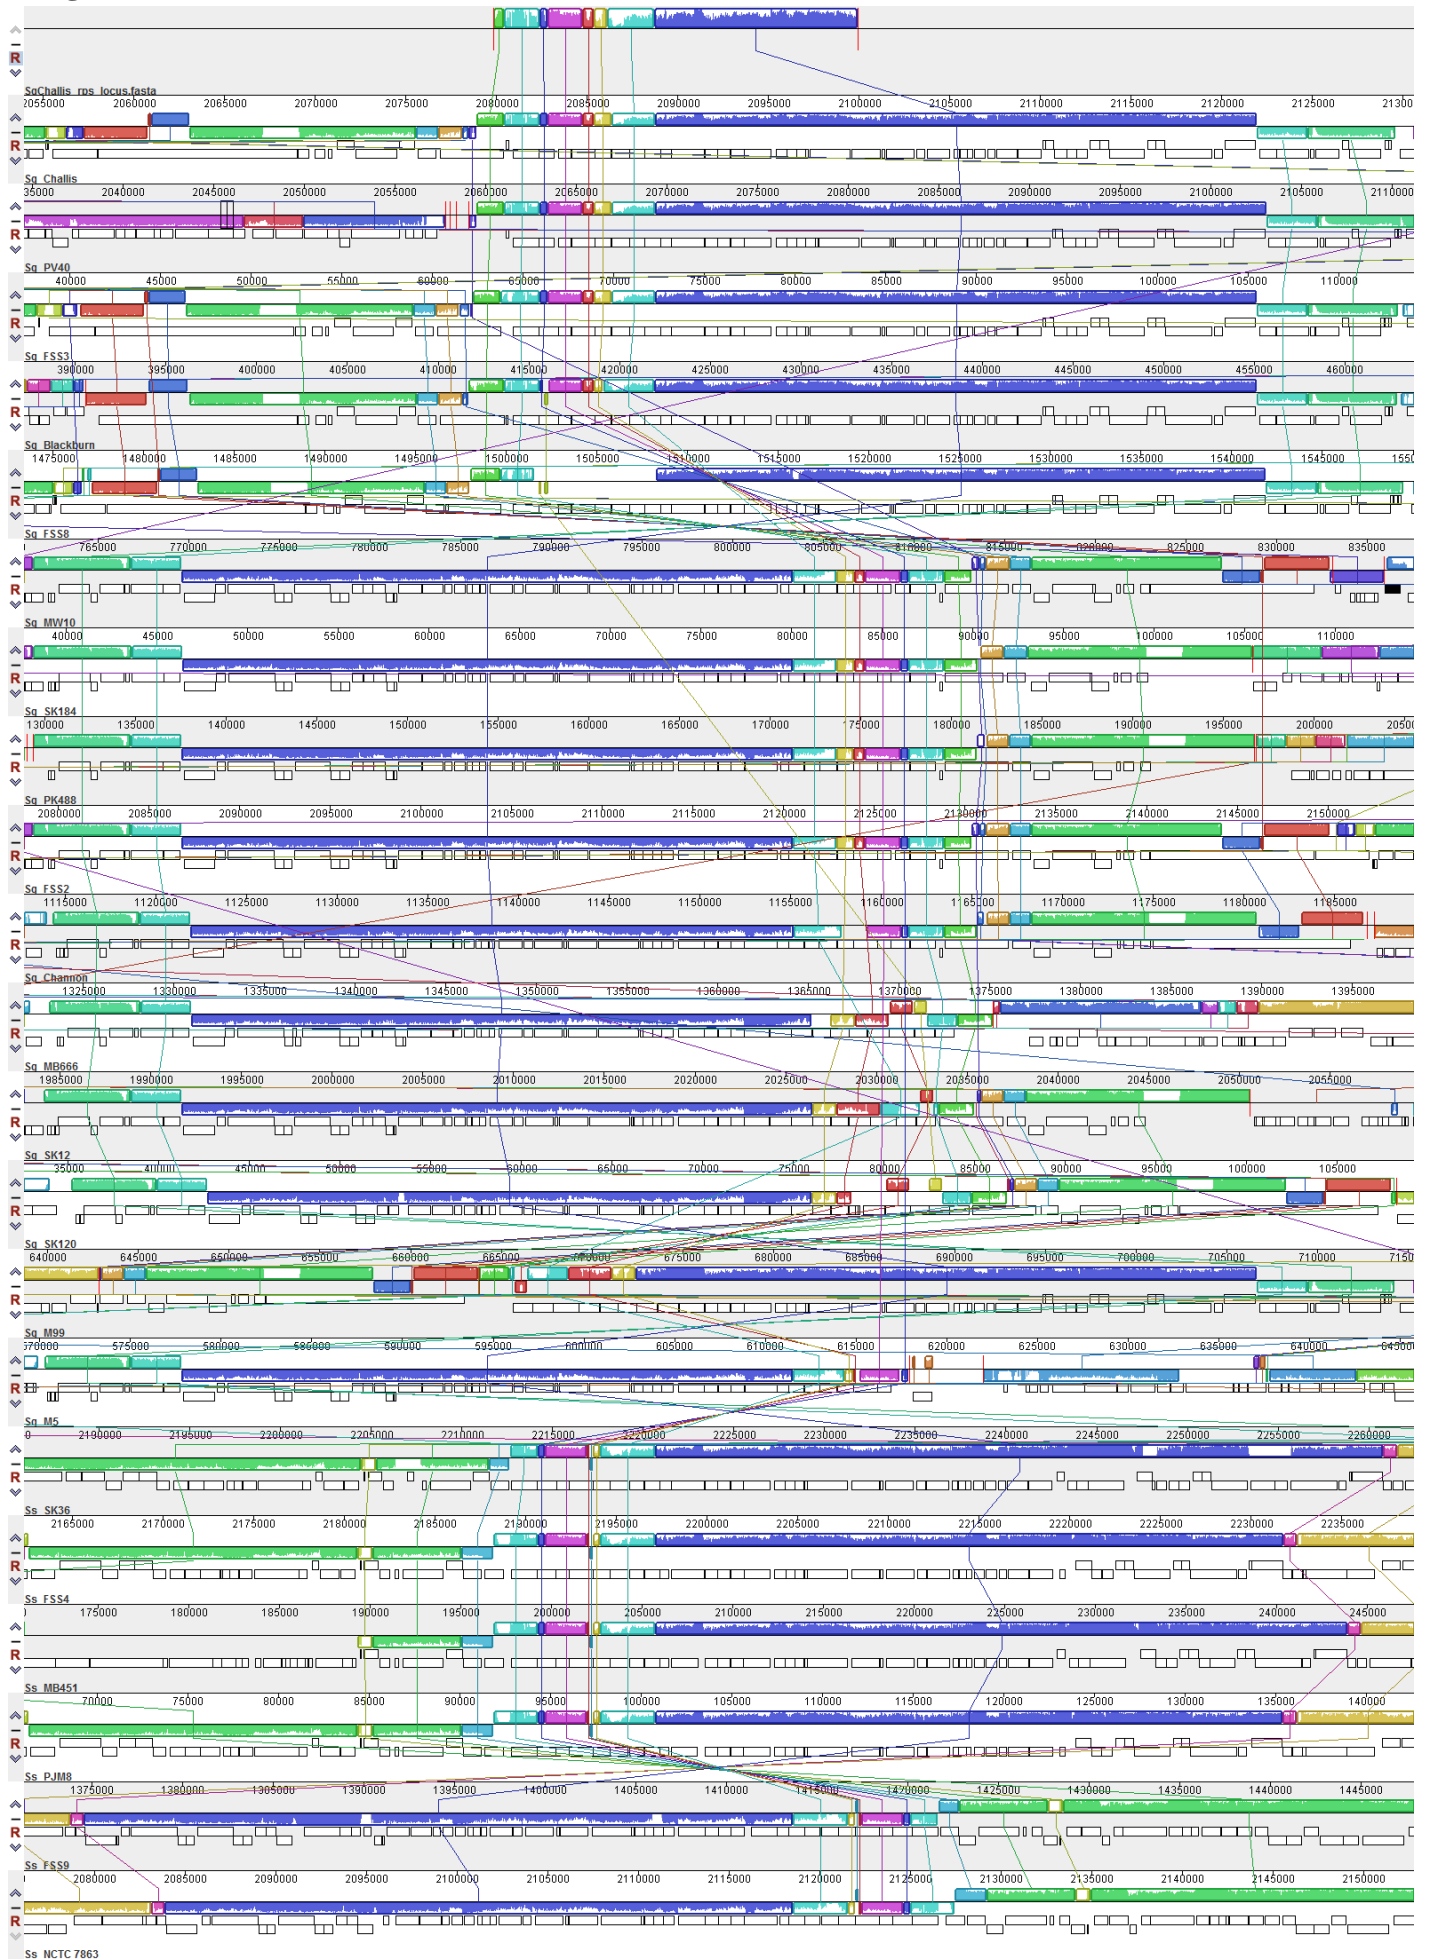

**S3 Figure.** A. Adhesion of Sg M99, PK488 and DL1 to fetuin (red bars) or sialidase-treated fetuin (yellow bars). The substrate was immobilised on a plastic surface and exposed to bacteria for 2 h at 37°C. After washing, bound bacterial cells were stained with crystal violet and quantified by measuring  $A_{595}$  as described previously<sup>1</sup>. Bars represent means from three independent experiments and standard errors are shown. B. Phylogenetic analysis of N-terminal binding regions of serine-rich region proteins from Ss and Sg. The evolutionary history was inferred using the Neighbor-Joining method using *S. pneumoniae* INV200 PsrP as an outgroup<sup>2</sup>. The percentage of replicate trees in which the associated taxa clustered together in the bootstrap test (500 replicates) are shown next to the branches<sup>3</sup>. The tree is drawn to scale, with branch lengths in the same units as those of the evolutionary distances used to infer the phylogenetic tree. The evolutionary distances were computed using the Poisson correction method<sup>4</sup> and are shown as the number of amino acid substitutions per site. Evolutionary analyses were conducted in MEGA7<sup>5</sup>. The binding region sequences of Sg PK488 and FSS4 clustered separately from the relatively tight GspB and Hsa variant groups (Sg strains) or the SrpA-type proteins, which were found only in Ss strains.

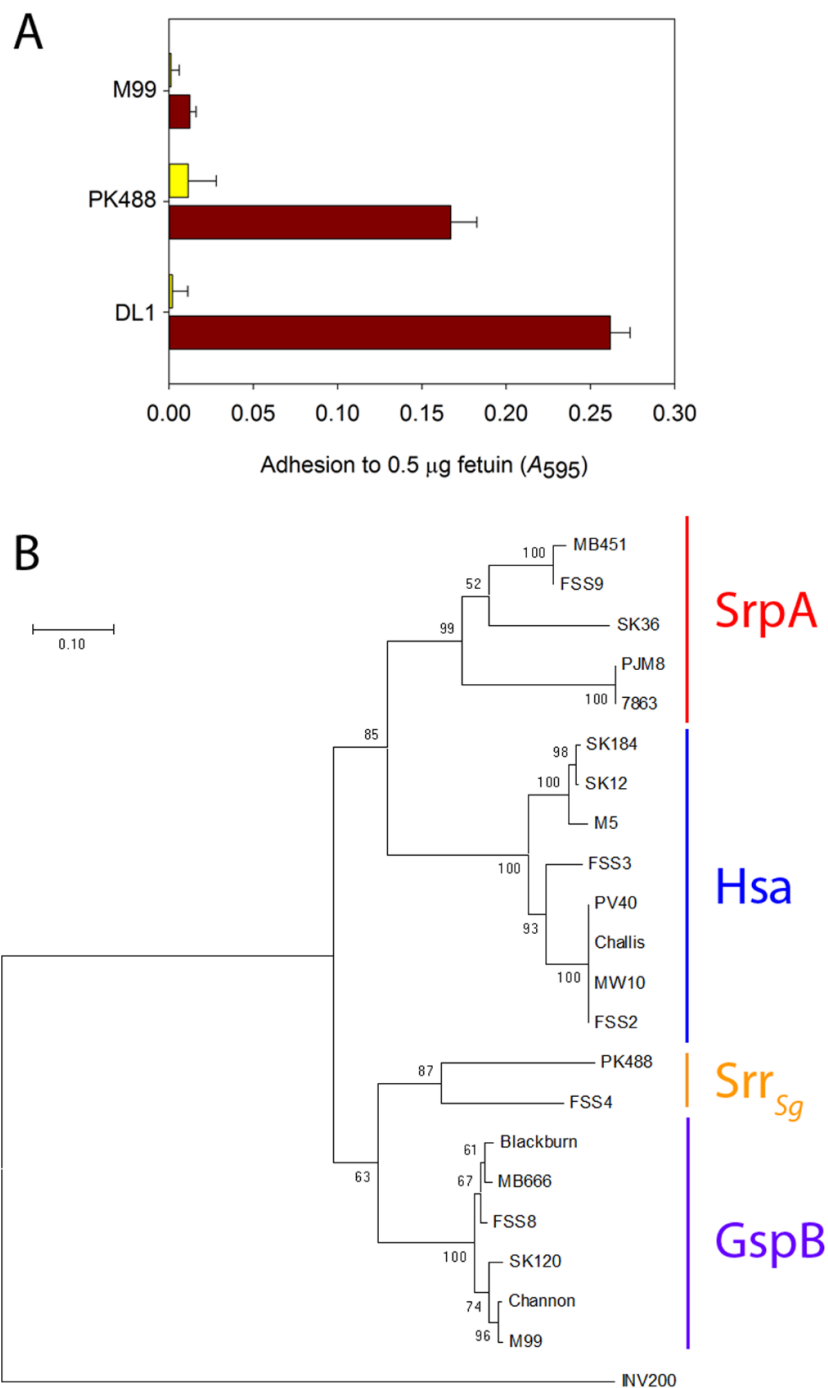

## Supplemental references

1. Jakubovics, N.S., Brittan, J. L., Dutton, L.C. & Jenkinson, H.F. Multiple adhesin proteins on the cell surface of *Streptococcus gordonii* are involved in adhesion to human fibronectin. *Microbiology* **155**, 3572-3580 (2009).
2. Saitou N. & Nei M. The neighbor-joining method: A new method for reconstructing phylogenetic trees. *Molecular Biology and Evolution* **4**, 406-425 (1987).
3. Felsenstein J. Confidence limits on phylogenies: An approach using the bootstrap. *Evolution* **39**, 783-791 (1985).
4. Zuckerkandl E. & Pauling L. Evolutionary divergence and convergence in proteins. Edited in *Evolving Genes and Proteins* by V. Bryson and H.J. Vogel, pp. 97-166. Academic Press, New York (1965).
5. Kumar S., Stecher G., & Tamura K. MEGA7: Molecular Evolutionary Genetics Analysis version 7.0 for bigger datasets. *Molecular Biology and Evolution* **33**:1870-1874 (2016).
